# Supplementary material for: Influence of objective and perceived exposures to urban nature on people’s happiness
Source: Research Square preprint supplement (doi:10.21203/rs.3.rs-6235999/v1), 2025-05-13
Supplement: Supplementary file 1 [file 863d23bef2c230528605b6a5.docx]

**Supplementary: How objective and perceived exposures to nature impact people’s happiness in Tokyo**

| **Supplementary - Table of Contents** | **Pages** |
| --- | --- |
| **Supplementary Figures** | 2-4 |
| - **Supplementary Figure 1.** Study area - **Supplementary Figure 2.** Assessment of indirect exposure through window views - **Supplementary Figure 3.** Assessment of incidental exposure through street views - **Supplementary Figure 4.** Assessment of intentional exposure through park proximity - **Supplementary Figure 5.** Assessment of the quantities of unplanned natural resources |  |
| **Supplementary Tables** | 5-9 |
| - **Supplementary Table 1.** OLS regression results for three types of objective exposures to nature and happiness - **Supplementary Table 2.** Collinearity analysis results of three types of nature exposure indicators and covariates for OLS regression - **Supplementary Table 3.** Validity test of OLS regression - **Supplementary Table 4.** SEM results for objective and perceived exposures to nature and happiness - **Supplementary Table 5.** Model fit of SEM using five different buffer zone sizes - **Supplementary Table 6.** Moran’s I test result for residuals of OLS regressions - **Supplementary Table 7.** Moran’s I test result for residuals of linear regressions a) between happiness and perceived exposure (Equation 12), and b) between perceived and objective exposure (Equation 13) in SEM |  |

i) Study area


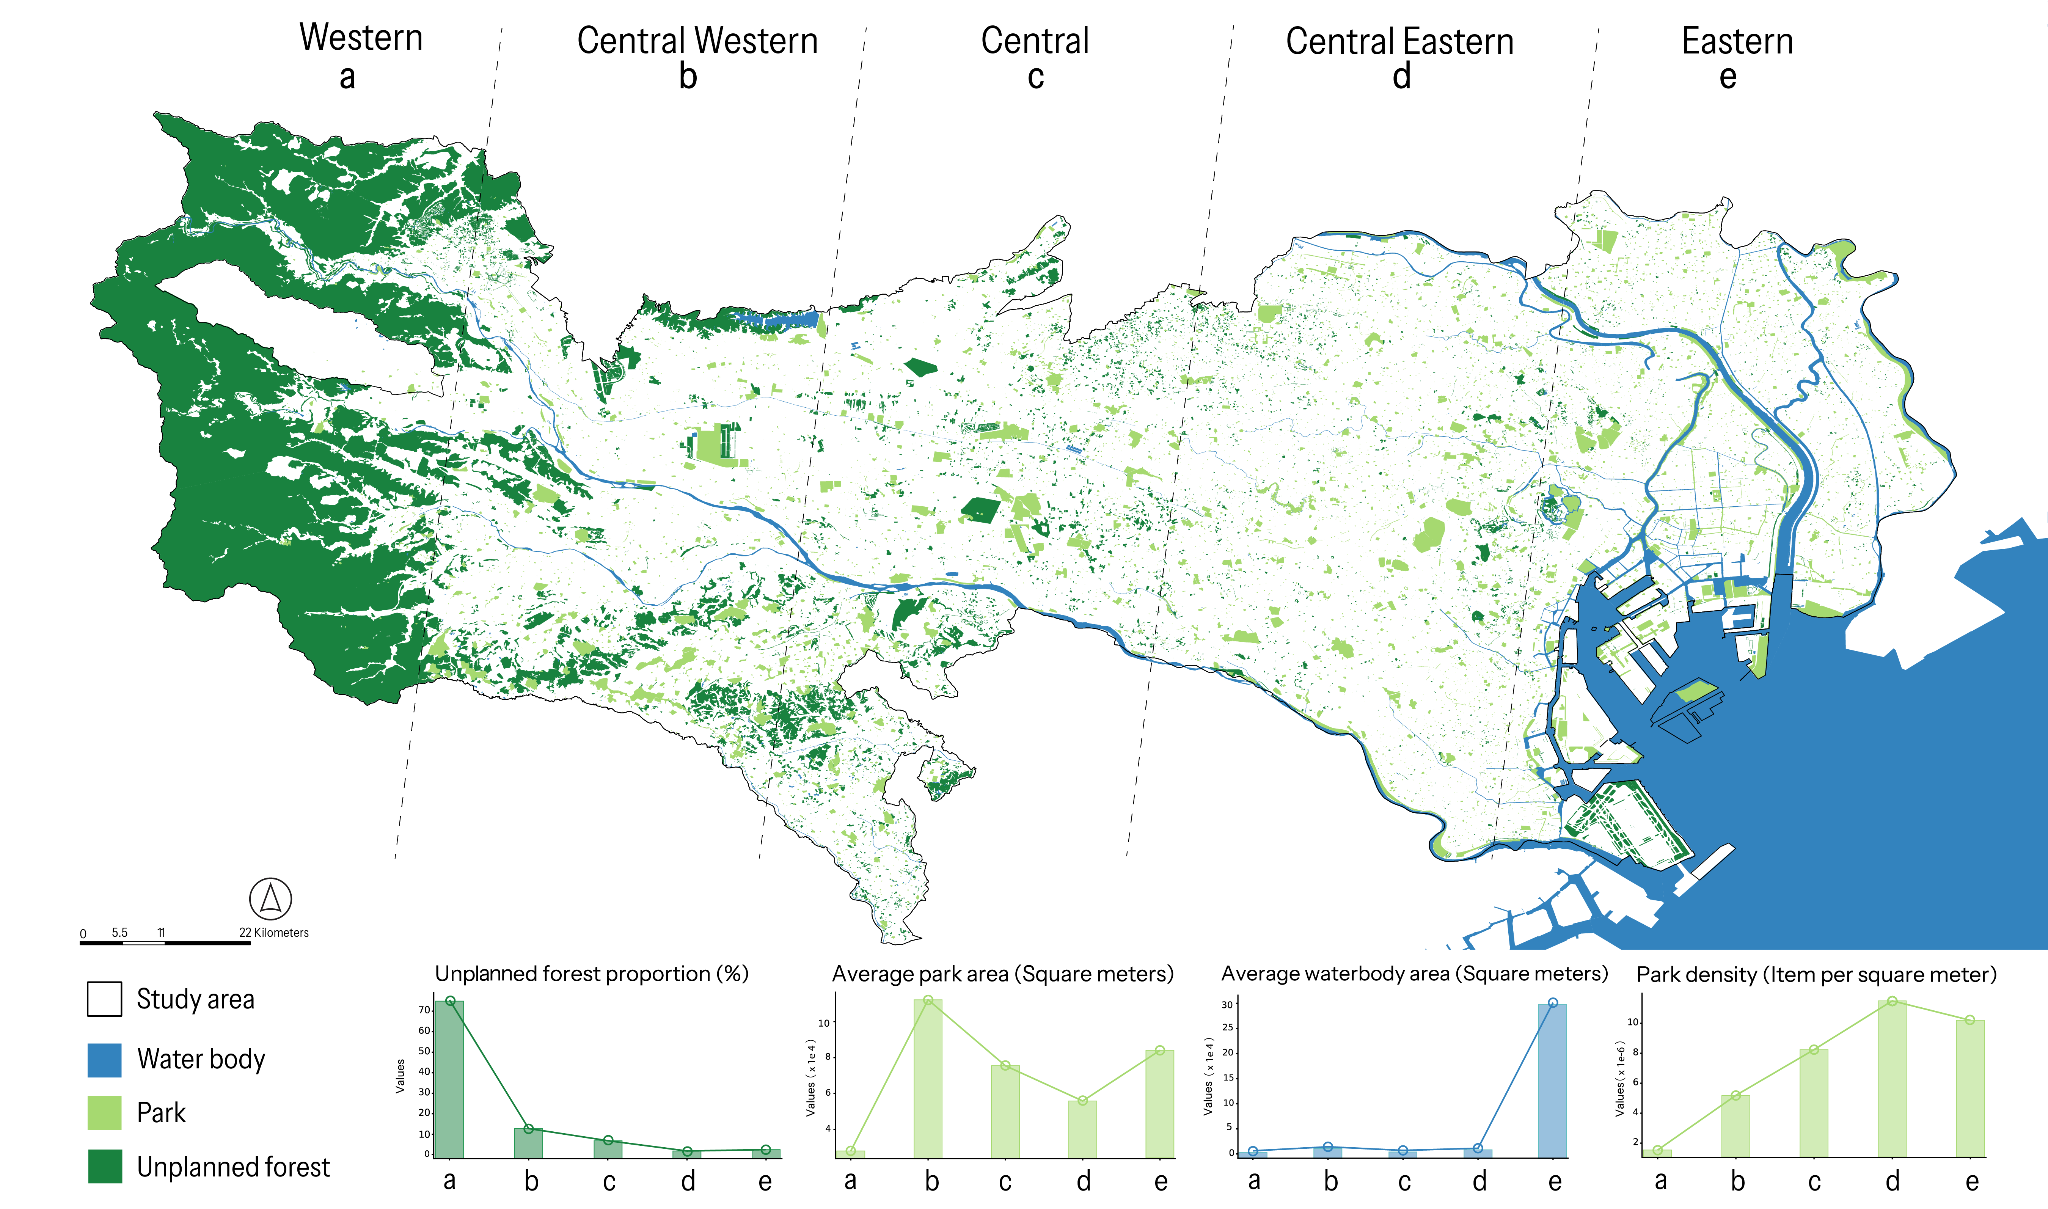


**Supplementary Figure 1.** Study area. (a) Western, (b) Central Western, (c) Central, (d) Central Eastern, and (e) Eastern regions of urban Tokyo.

ii) Assessment of indirect exposure through window views


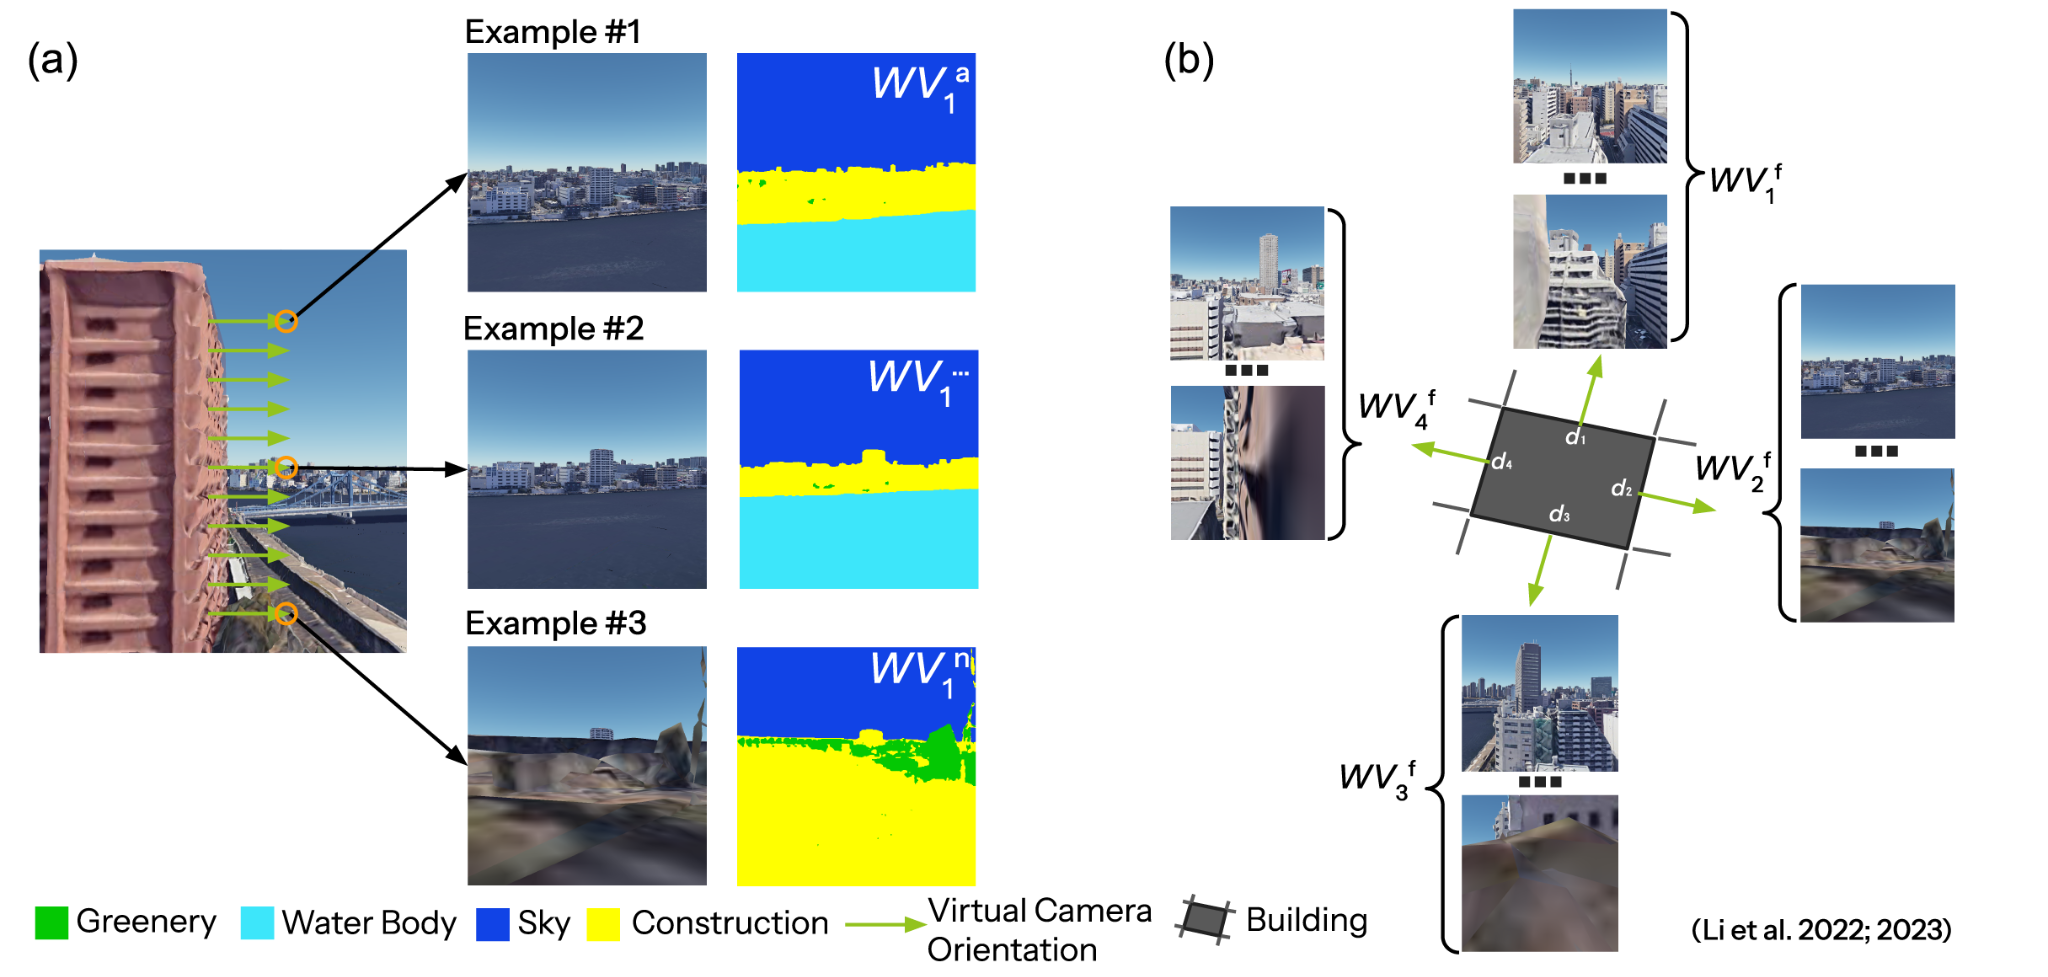


**Supplementary Figure 2.** Assessment of indirect exposure through window views. (a) WVs collected from photorealistic window view samples through semantic segmentation and (b) Collection of WVs from all building facades for *WV*bldg.

iii) Assessment of incidental exposure through street views.


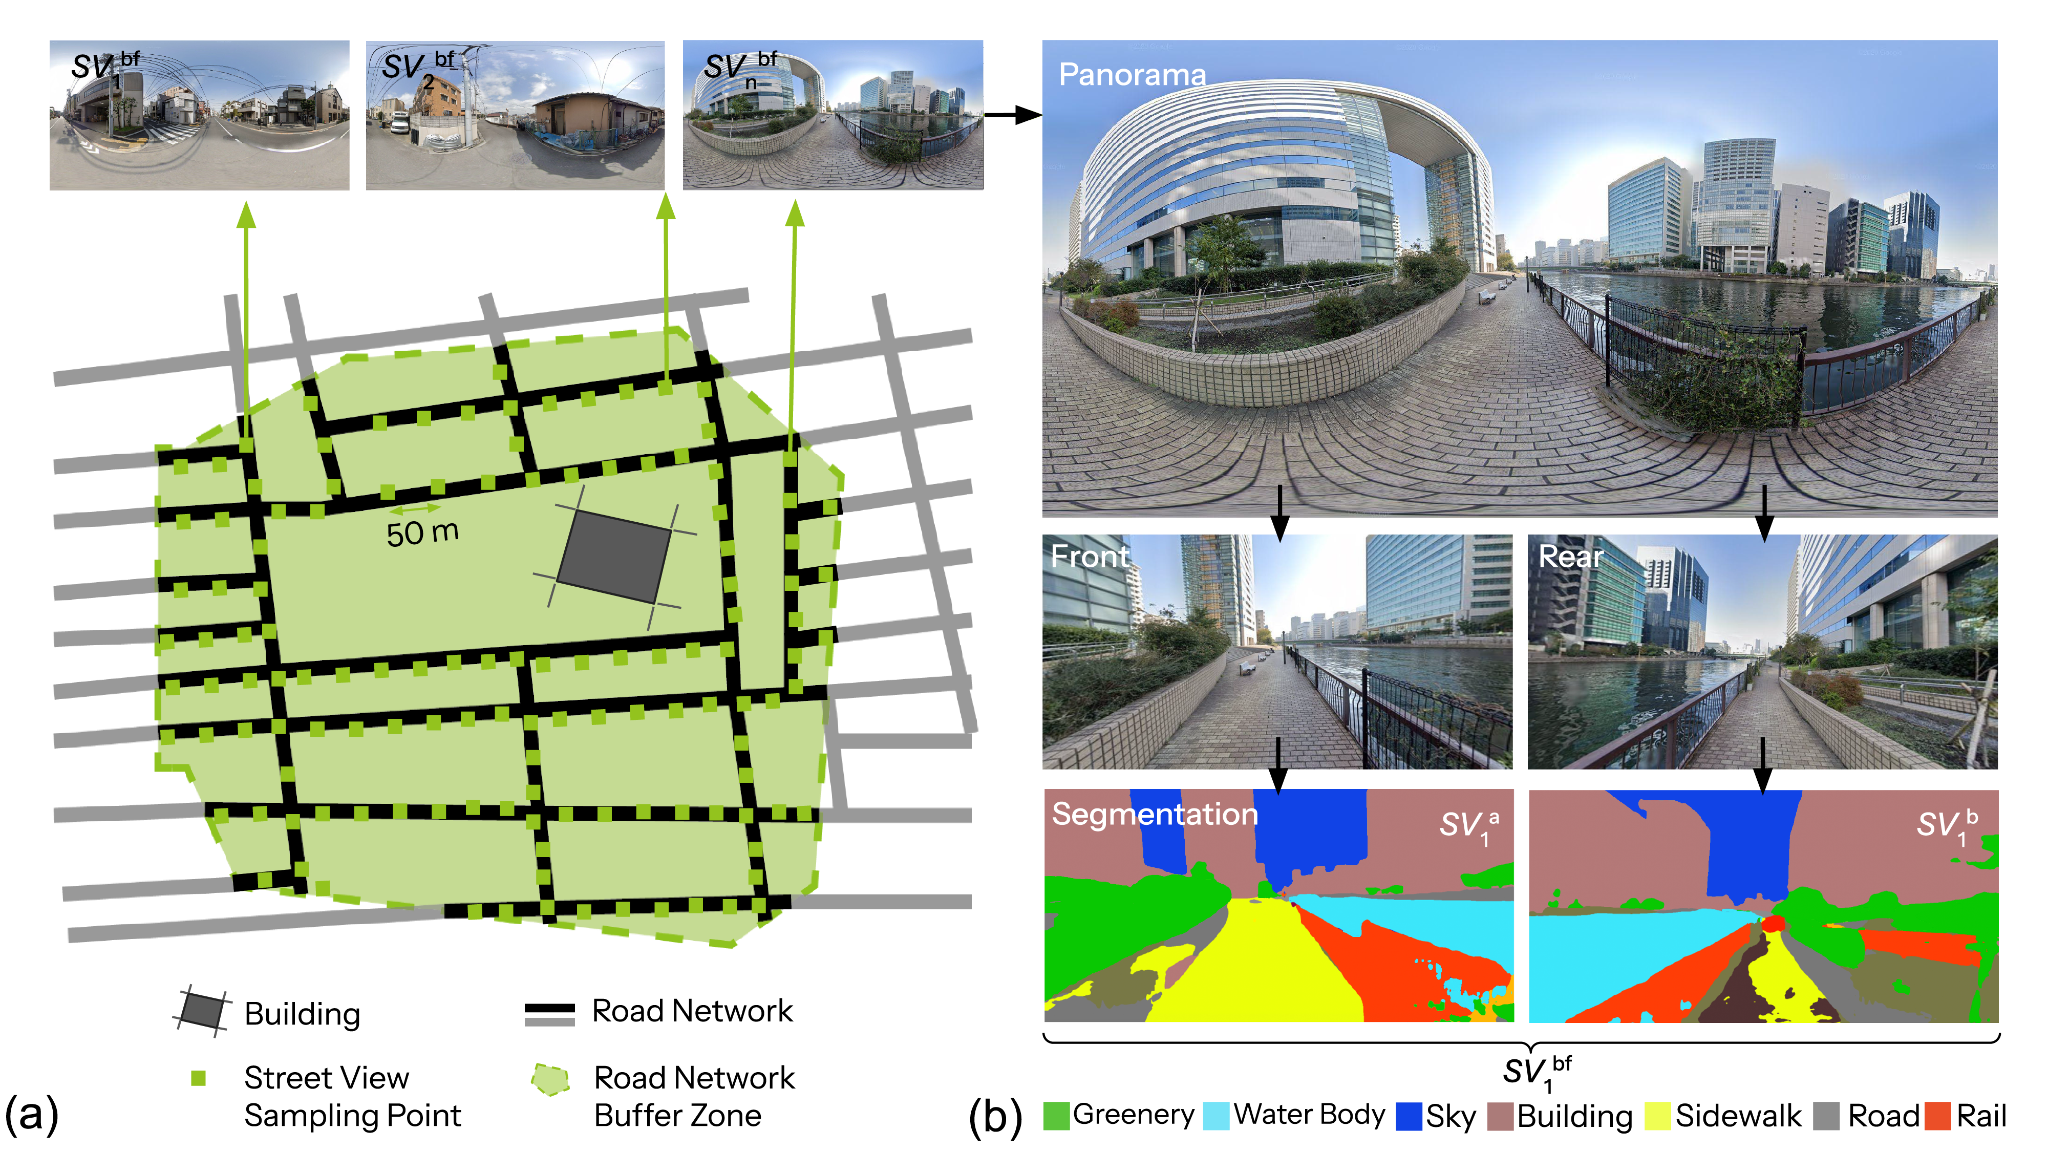


**Supplementary Figure 3.** Assessment of incidental exposure through street views. (a) Sampling of street views alongside the road networks and (b) semantic segmentation of front and rear views converted from street view panoramas for SVs.

iv) Assessment of intentional exposure through park proximity.


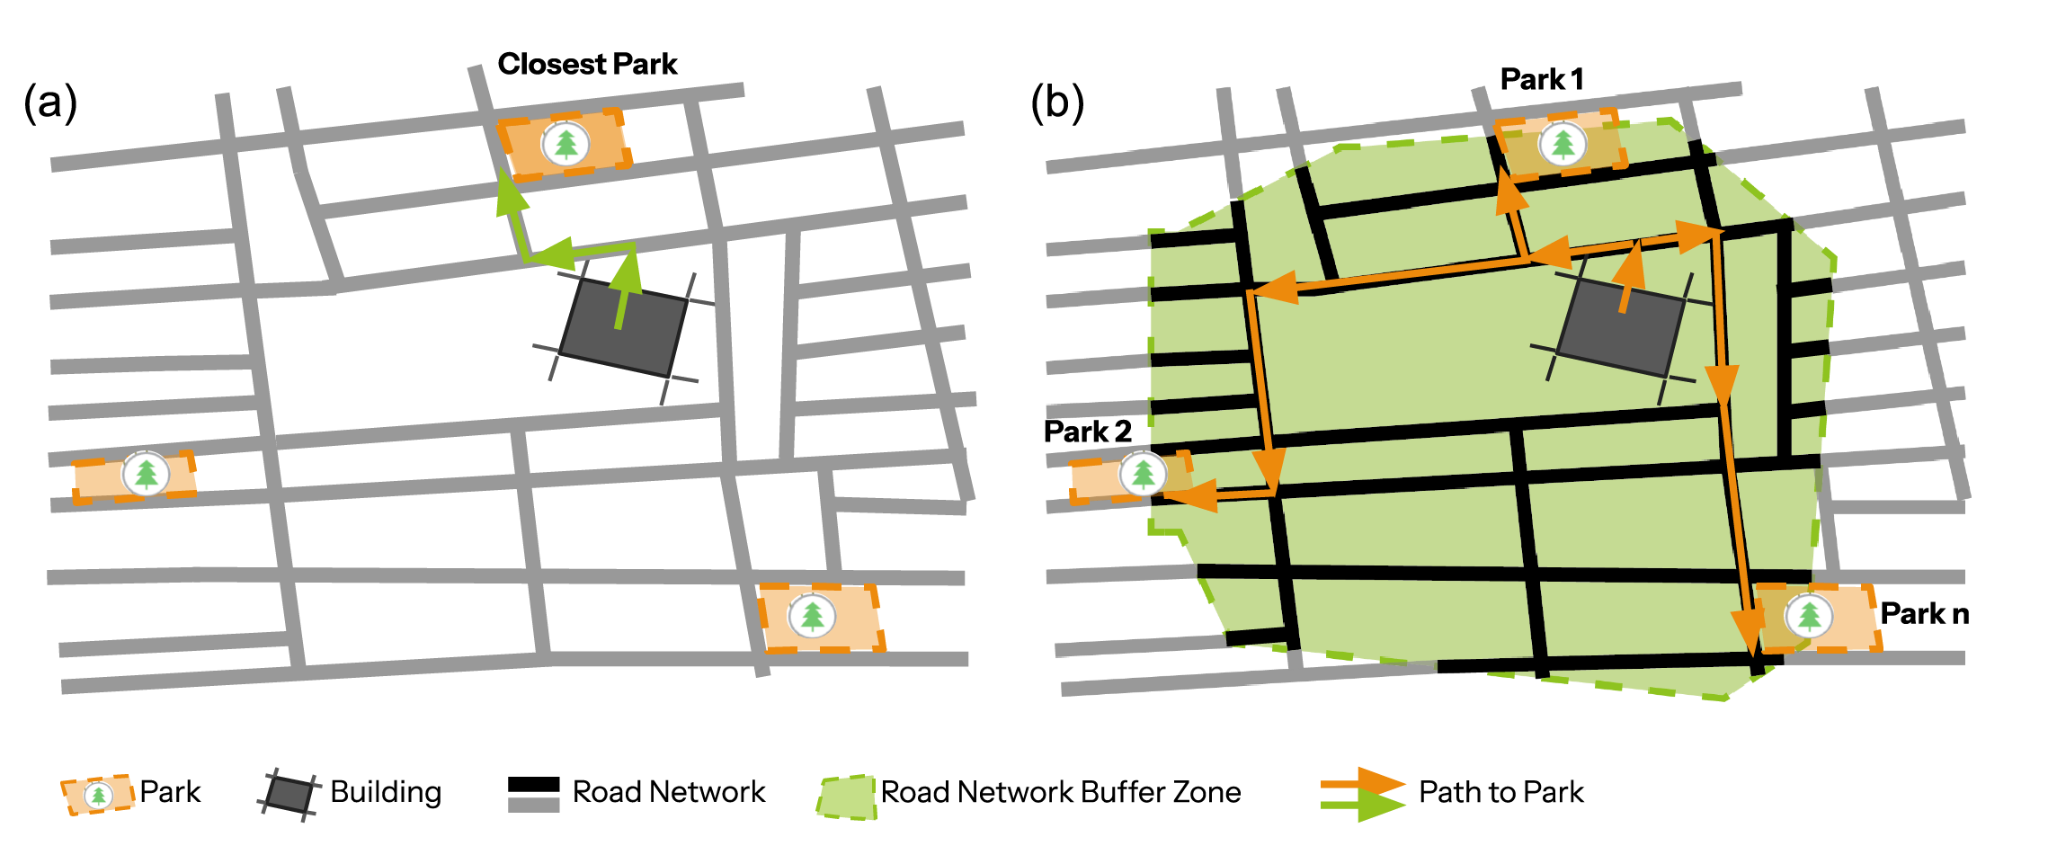


**Supplementary Figure 4.** Assessment of intentional exposure through park proximity. (a) Closest and (b) accessible parks in different sizes of buffer zones.

v) Assessment of the quantities of unplanned natural resources


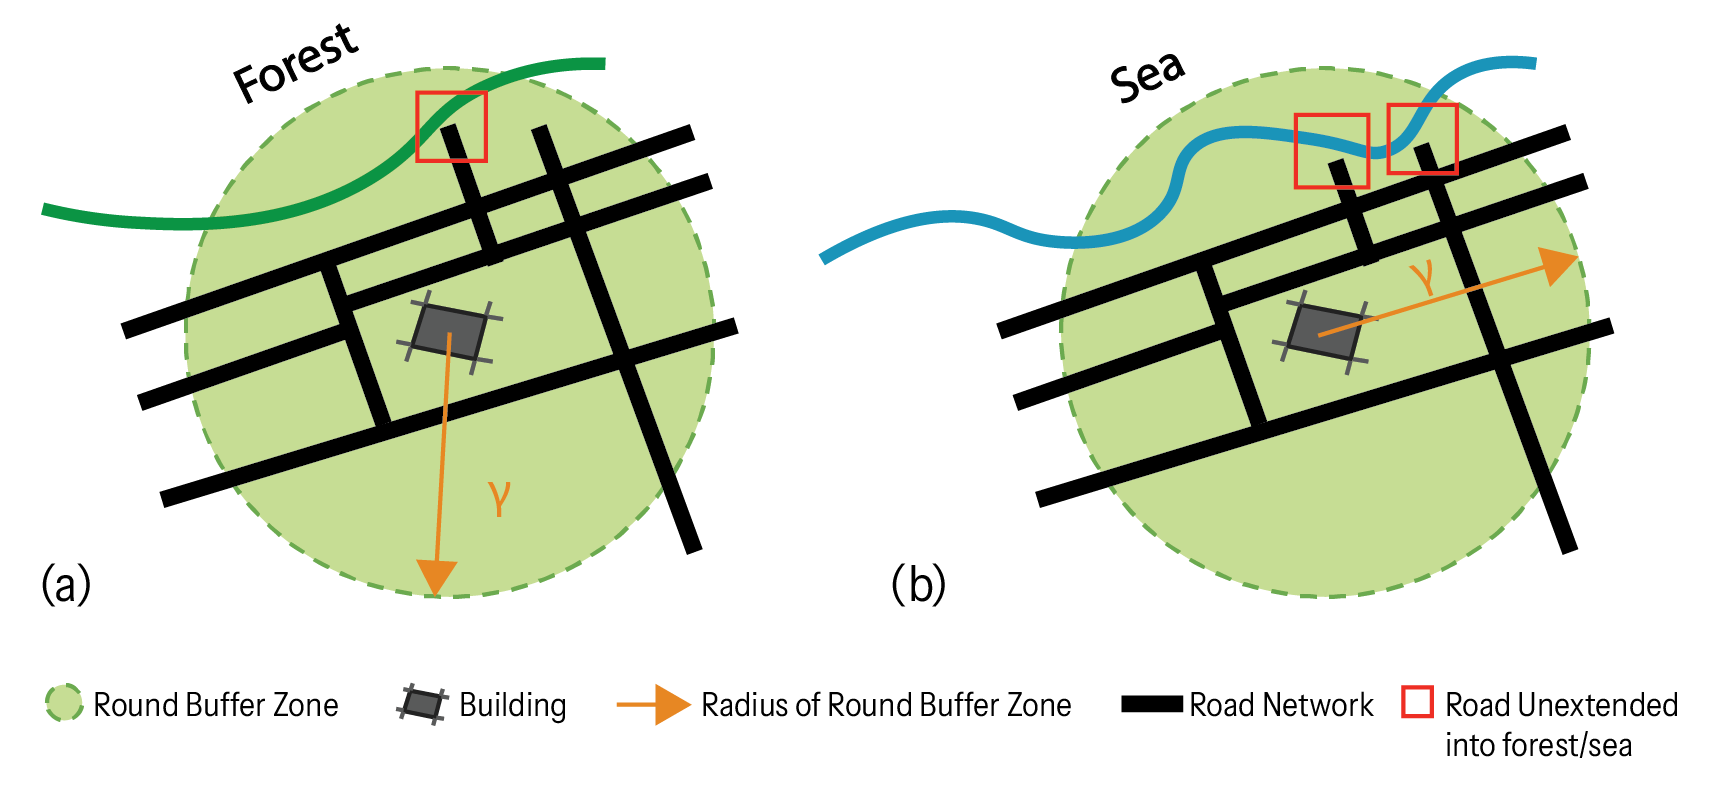


**Supplementary Figure 5.** Assessment of the quantities of unplanned natural resources. Inaccessible (a) forests and (b) sea and rivers within buffer zones.

vi) OLS regression results with the buffer zone sizes at 500 m, 750 m, 1,000 m, and 1,500 m.

**Supplementary Table 1.** OLS regression results for three types of objective exposures to nature and happiness

|  | **Standardized coefficients (β)** | | | | | | | |
| --- | --- | --- | --- | --- | --- | --- | --- | --- |
| **Descriptor** | **MCP500** | **MAP500** | **MCP750** | **MAP750** | **MCP1000** | **MAP1000** | **MCP1500** | **MAP1500** |
| Intercept | 0 | 0 | 0 | 0 | 0 | 0 | 0 | 0 |
| ZMaleProp | 0.023 | 0.023 | 0.023 | 0.023 | 0.023 | 0.022 | 0.023 | 0.022 |
| ZAvgAge | 0.077* | 0.076* | 0.079* | 0.076* | 0.081** | 0.077* | 0.080* | 0.079* |
| ZPhysicalSatus | 0.068 | 0.066 | 0.069 | 0.068 | 0.073 | 0.071 | 0.076 | 0.075 |
| ZMentalStatus | 0.424*** | 0.425*** | 0.421*** | 0.423*** | 0.419*** | 0.420*** | 0.417*** | 0.416*** |
| ZIncomeSatisfaction | 0.159*** | 0.158*** | 0.163*** | 0.165*** | 0.166*** | 0.169*** | 0.169*** | 0.171*** |
| Zln(WVgreen) | 0.068 | 0.069 | 0.057 | 0.060 | 0.069 | 0.062 | 0.066 | 0.054 |
| Zln(WVwater) | -0.009 | -0.006 | -0.010 | -0.008 | -0.003 | 0.001 | 0.006 | 0.009 |
| Zln(SVgreen) | -0.030 | -0.020 | -0.041 | -0.021 | -0.063 | -0.053 | -0.066 | -0.068 |
| Zln(SVwater) | 0.056 | 0.058 | 0.064 | 0.070 | 0.062 | 0.072 | 0.041 | 0.054 |
| Zln(CPgreen) | -0.025 |  | -0.020 |  | -0.016 |  | -0.022 |  |
| Zln(CPwater) | 0.053 |  | 0.048 |  | 0.037 |  | 0.041 |  |
| Zln(APgreen) |  | -0.042 |  | -0.065 |  | -0.046 |  | -0.022 |
| Zln(APwater) |  | 0.070 |  | 0.067 |  | 0.012 |  | -0.017 |
| Zln(UF) | 0.012 | 0.013 | 0.047 | 0.051 | 0.052 | 0.052 | 0.060 | 0.054 |
| Zln(UW) | -0.048 | -0.057 | -0.041 | -0.051 | -0.023 | -0.015 | -0.030 | -0.009 |
| Adjusted R2 | 0.315 | 0.316 | 0.316 | 0.318 | 0.316 | 0.317 | 0.316 | 0.315 |
| AIC | 1985.585 | 1984.525 | 1984.762 | 1982.071 | 1984.483 | 1983.657 | 1985.076 | 1985.755 |

Note: Significance codes: *** : < 0.001; ** : < 0.01; * : < 0.05.

vii) Validity test of OLS regression

The values of Variance Inflation Factors (VIFs) less than 2.603 as shown in Supplementary Table 2 indicated that there was no severe multicollinearity among three types of objective exposure indicators and covariates. The Durbin-Watson values slightly less than 2 were acceptable. The p-value of F statistic less than 0.001 confirmed the validity of the regression model.

**Supplementary Table 2.** Collinearity analysis results of three types of nature exposure indicators and covariates for OLS regression

|  | **Variance Inflation Factor (VIF)** | | | | | | | | | |
| --- | --- | --- | --- | --- | --- | --- | --- | --- | --- | --- |
| **Descriptor** | **OLSCP500** | **OLSAP500** | **OLSCP750** | **OLSAP750** | **OLSCP1000** | **OLSAP1000** | **OLSCP1250** | **OLSAP1250** | **OLSCP1500** | **OLSAP1500** |
| Intercept |  |  |  |  |  |  |  |  |  |  |
| ZMaleProp | 1.056 | 1.056 | 1.057 | 1.057 | 1.056 | 1.055 | 1.055 | 1.054 | 1.055 | 1.054 |
| ZAvgAge | 1.128 | 1.127 | 1.127 | 1.129 | 1.131 | 1.134 | 1.128 | 1.130 | 1.127 | 1.128 |
| ZPhysicalSatus | 2.108 | 2.108 | 2.098 | 2.098 | 2.091 | 2.094 | 2.090 | 2.092 | 2.090 | 2.094 |
| ZMentalStatus | 2.094 | 2.095 | 2.086 | 2.084 | 2.086 | 2.088 | 2.087 | 2.088 | 2.084 | 2.083 |
| ZIncomeSatisfaction | 1.401 | 1.402 | 1.416 | 1.418 | 1.424 | 1.433 | 1.428 | 1.442 | 1.432 | 1.451 |
| Zln(WVgreen) | 2.550 | 2.474 | 2.539 | 2.471 | 2.564 | 2.456 | 2.587 | 2.468 | 2.603 | 2.460 |
| Zln(WVwater) | 1.446 | 1.420 | 1.439 | 1.408 | 1.267 | 1.237 | 1.204 | 1.176 | 1.225 | 1.206 |
| Zln(SVgreen) | 2.404 | 2.419 | 2.449 | 2.496 | 2.437 | 2.499 | 2.411 | 2.477 | 2.409 | 2.476 |
| Zln(SVwater) | 1.525 | 1.528 | 1.612 | 1.606 | 1.441 | 1.433 | 1.394 | 1.386 | 1.428 | 1.415 |
| Zln(CPgreen) | 1.487 |  | 1.490 |  | 1.477 |  | 1.457 |  | 1.440 |  |
| Zln(CPwater) | 1.483 |  | 1.466 |  | 1.426 |  | 1.408 |  | 1.421 |  |
| Zln(APgreen) |  | 1.400 |  | 1.382 |  | 1.278 |  | 1.232 |  | 1.212 |
| Zln(APwater) |  | 1.857 |  | 1.960 |  | 1.917 |  | 1.887 |  | 1.958 |
| Zln(UF) | 1.304 | 1.302 | 1.432 | 1.435 | 1.536 | 1.541 | 1.582 | 1.581 | 1.628 | 1.619 |
| Zln(UW) | 1.317 | 1.433 | 1.342 | 1.534 | 1.294 | 1.536 | 1.274 | 1.511 | 1.291 | 1.601 |

**Supplementary Table 3.** Validity test of OLS regression

| **Test** | **OLSCP**  **500** | **OLSAP**  **500** | **OLSCP**  **750** | **OLSAP**  **750** | **OLSCP**  **1000** | **OLSAP**  **1000** | **OLSCP1250** | **OLSAP1250** | **OLSCP1500** | **OLSAP1500** |
| --- | --- | --- | --- | --- | --- | --- | --- | --- | --- | --- |
| Durbin-Watson | 1.980 | 1.985 | 1.982 | 1.985 | 1.987 | 1.986 | 1.987 | 1.984 | 1.986 | 1.982 |
| ANOVA F-statistic | 29.34*** | 29.46*** | 29.43*** | 29.74*** | 29.47*** | 29.56*** | 29.49*** | 29.48*** | 29.40*** | 29.32*** |

Note: Significance codes: *** : < 0.001; ** : < 0.01; * : < 0.05.

viii) SEM results with the buffer zone sizes at 500 m, 750 m, 1,000 m, and 1,500 m.

**Supplementary Table 4.** SEM results for objective and perceived exposures to nature and happiness

|  | **Standardized coefficients (β)** | | | | | | | |
| --- | --- | --- | --- | --- | --- | --- | --- | --- |
| **Descriptor** | **MCP500** | **MAP500** | **MCP750** | **MAP750** | **MCP1000** | **MAP1000** | **MCP1500** | **MAP1500** |
| **Direct effects on happiness** |  |  |  |  |  |  |  |  |
| ZMaleProp | 0.028 | 0.028 | 0.028 | 0.028 | 0.028 | 0.028 | 0.028 | 0.028 |
| ZAvgAge | 0.077* | 0.077* | 0.077* | 0.077* | 0.077* | 0.077* | 0.077* | 0.077* |
| ZPhysicalStatus | 0.074 | 0.074 | 0.074 | 0.074 | 0.074 | 0.074 | 0.074 | 0.074 |
| ZMentalStatus | 0.411*** | 0.411*** | 0.411*** | 0.411*** | 0.411*** | 0.411*** | 0.411*** | 0.411*** |
| ZIncomeSatisfaction | 0.157*** | 0.157*** | 0.157*** | 0.157*** | 0.157*** | 0.157*** | 0.157*** | 0.157*** |
| ZPerceivedNatureExposure | 0.062* | 0.062* | 0.062* | 0.062* | 0.062* | 0.062* | 0.062* | 0.062* |
| **Indirect effects mediated by perceived exposure** |  |  |  |  |  |  |  |  |
| Zln(WVgreen) | 0.016*** | 0.018*** | 0.017*** | 0.018*** | 0.016*** | 0.018*** | 0.014*** | 0.017*** |
| Zln(WVwater) | -0.003 | -0.003 | -0.003 | -0.003 | -0.003 | -0.002 | -0.002 | -0.001 |
| Zln(SVgreen) | 0.010*** | 0.008** | 0.009*** | 0.006* | 0.007** | 0.005* | 0.007** | 0.006* |
| Zln(SVwater) | -0.000# | -0.001 | -0.000# | -0.002 | -0.001 | -0.002 | -0.004* | -0.005** |
| Zln(CPgreen) | 0.003 |  | 0.003 |  | 0.003 |  | 0.003 |  |
| Zln(CPwater) | 0.003 |  | 0.003 |  | 0.005* |  | 0.007*** |  |
| Zln(APgreen) |  | 0.008*** |  | 0.010*** |  | 0.010*** |  | 0.008*** |
| Zln(APwater) |  | 0.006** |  | 0.004 |  | 0.004* |  | 0.005* |
| Zln(UF) | 0.007*** | 0.007*** | 0.009*** | 0.009*** | 0.014*** | 0.013*** | 0.018*** | 0.017*** |
| Zln(UW) | 0.006** | 0.004* | 0.008*** | 0.006** | 0.006** | 0.005** | 0.003 | 0.004 |
| ZMaleProp | -0.005** | -0.005** | -0.005** | -0.005** | -0.005** | -0.004** | -0.004** | -0.005** |
| ZAvgAge | -0.003 | -0.003 | -0.003 | -0.003 | -0.003 | -0.002 | -0.003 | -0.003 |
| ZPhysicalStatus | 0.004* | 0.004 | 0.004 | 0.004 | 0.004 | 0.003 | 0.004 | 0.004 |
| ZMentalStatus | 0.002 | 0.003 | 0.003 | 0.003 | 0.003 | 0.004 | 0.003 | 0.003 |
| ZIncomeSatisfaction | 0.005** | 0.005* | 0.005** | 0.005** | 0.006** | 0.005** | 0.007*** | 0.006** |

Note: #: > -0.0005; Significance codes: *** : < 0.001; ** : < 0.01; *: < 0.05.

ix) Validity test of SEM

Supplementary Table 5 lists the test results of constructed Structural Equation Models (SEM) using two types of intentional nature exposure metrics, i.e., CPs and AP, respectively. The analyses were conducted across buffer zones of 500 m, 750 m, 1,000 m, 1,250 m, and 1,500 m. All constructed models were valid according to the tests. Specifically, the *p* values of the Chi-squared test were larger than 0.05, reflecting an acceptable model fit. All models both passed four evaluation metrics, i.e., GFI (> 0.90), CFI (> 0.95), SRMR (< 0.08), and RMSEA (< 0.05).

**Supplementary Table 5.** Modelfit of SEM using five different buffer zone sizes

| **Model** | **CHISQ** | **Siginfiance (*p*)** | **CHISQ/df** | **GFI** | **CFI** | **SRMR** | **RMSEA** |
| --- | --- | --- | --- | --- | --- | --- | --- |
| MCP500 | 8.038 | 0.530 | 0.893 | 0.999 | 1.000 | 0.007 | 0.000 |
| MAP500 | 9.430 | 0.399 | 1.048 | 0.999 | 0.999 | 0.007 | 0.008 |
| MCP750 | 8.051 | 0.529 | 0.895 | 0.999 | 1.000 | 0.007 | 0.000 |
| MAP750 | 11.958 | 0.216 | 1.329 | 0.998 | 0.993 | 0.007 | 0.020 |
| MCP1000 | 7.882 | 0.546 | 0.876 | 0.999 | 1.000 | 0.007 | 0.000 |
| MAP1000 | 10.023 | 0.349 | 1.114 | 0.998 | 0.998 | 0.007 | 0.012 |
| MCP1250 | 8.215 | 0.513 | 0.913 | 0.999 | 1.000 | 0.006 | 0.000 |
| MAP1250 | 9.297 | 0.410 | 1.033 | 0.999 | 0.999 | 0.007 | 0.006 |
| MCP1500 | 7.281 | 0.608 | 0.809 | 0.999 | 1.000 | 0.006 | 0.000 |
| MAP1500 | 7.568 | 0.578 | 0.841 | 0.999 | 1.000 | 0.006 | 0.000 |

x) Moran’s I test of residuals in OLS regression and SEM

Moran’s I test results in both Supplementary Tables 6 and 7 (Statistic close to 0, *p* > 0.05) suggest no spatial autocorrelation of residuals in both OLS regression and SEM.

**Supplementary Table 6.** Moran’s I test result for residuals of OLS regressions

| **Model** | **Statistic** | **Z-score** | **Siginfiance (*p*)** |
| --- | --- | --- | --- |
| OLSCP500 | 0.013 | 0.675 | 0.250 |
| OLSAP500 | 0.009 | 0.494 | 0.311 |
| OLSCP750 | 0.013 | 0.662 | 0.254 |
| OLSAP750 | 0.011 | 0.584 | 0.280 |
| OLSCP1000 | 0.010 | 0.520 | 0.302 |
| OLSAP1000 | 0.010 | 0.525 | 0.300 |
| OLSCP1250 | 0.009 | 0.500 | 0.308 |
| OLSAP1250 | 0.009 | 0.468 | 0.320 |
| OLSCP1500 | 0.010 | 0.534 | 0.297 |
| OLSAP1500 | 0.009 | 0.469 | 0.320 |

**Supplementary Table 7.** Moran’s I test result for residuals of linear regressions a) between happiness and perceived exposure (Equation 12), and b) between perceived and objective exposure (Equation 13) in SEM

| **Regression** | **Statistic** | **Z-score** | **Siginfiance (*p*)** |
| --- | --- | --- | --- |
| a | 0.012 | 0.646 | 0.259 |
| bCP500 | -0.026 | -2.281 | 0.989 |
| bAP500 | -0.022 | -1.908 | 0.972 |
| bCP750 | -0.026 | -2.213 | 0.987 |
| bAP750 | -0.022 | -1.854 | 0.968 |
| bCP1000 | -0.027 | -2.314 | 0.990 |
| bAP1000 | -0.022 | -1.917 | 0.972 |
| bCP1250 | -0.027 | -2.311 | 0.990 |
| bAP1250 | -0.023 | -1.958 | 0.975 |
| bCP1500 | -0.027 | -2.320 | 0.990 |
| bAP1500 | -0.025 | -2.172 | 0.985 |
